# Supplementary material
Source: MDPI journal article supplement (https://www.mdpi.com/2311-7524/7/5/113)
Supplement: s1 [file s1]

**Table S1.** The three-way analysis of variance (ANOVA) of bruise area, weight loss %, firmness,  $L^*$ ,  $a^*$ ,  $b^*$ , total soluble solids, total lycopene, and carotenoids

| Dependent variables         | Level of significance (P value) |                         |                      |         |         |         |
|-----------------------------|---------------------------------|-------------------------|----------------------|---------|---------|---------|
|                             | Drop height (A)                 | Storage temperature (B) | Storage duration (C) | A×B     | A×C     | B×C     |
| <b>Bruise area</b>          | =0.0001                         | =0.0001                 | <0.0001              | =0.9130 | <0.0001 | <0.0001 |
| <b>Weight loss %</b>        | =0.0298                         | =0.0218                 | <0.0001              | =0.0780 | =0.0020 | <0.0010 |
| <b>Firmness</b>             | =0.0094                         | <0.0001                 | <0.0001              | <0.0001 | =0.1310 | <0.0012 |
| $L^*$                       | =0.0405                         | =0.0302                 | =0.0052              | =0.3510 | <0.0001 | <0.0001 |
| $a^*$                       | =0.0014                         | =0.0221                 | =0.0012              | =0.0236 | =0.2160 | =0.0060 |
| $b^*$                       | =0.0080                         | =0.0143                 | <0.0001              | =0.3890 | =0.2190 | =0.0020 |
| <b>Total soluble solids</b> | =0.0230                         | =0.0020                 | =0.0010              | =0.0950 | =0.1601 | <0.0570 |
| <b>Total lycopene</b>       | =0.0070                         | =0.0050                 | =0.0330              | =0.0263 | =0.4190 | 0.0129  |
| <b>Total carotenoids</b>    | =0.0060                         | 0.0060                  | =0.0250              | =0.0390 | =0.4261 | <0.0200 |

$L^*$ , lightness;  $a^*$ , redness;  $b^*$ , yellowness,
